# Supplementary material for: Characterization of Triticum turgidum sspp. durum, turanicum, and polonicum grown in Central Italy in relation to technological and nutritional aspects
Source: Frontiers journal article supplement (doi:10.3389/fpls.2023.1269212), 2023-12-06
Supplement: Data_Sheet_1.PDF [file Data_Sheet_1.PDF]

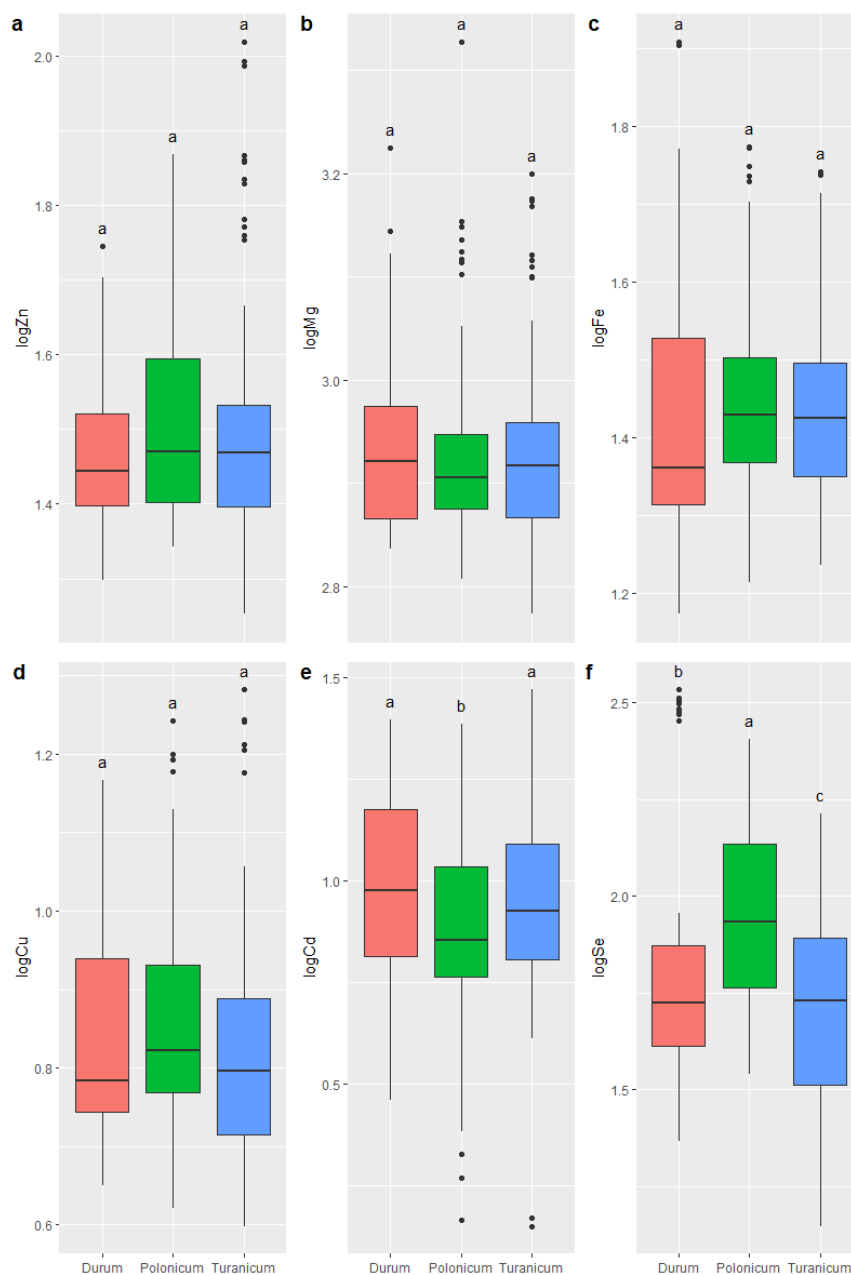

Figure S1 – Microelements content for subspecies. a) zinc, b) magnesium, c) iron, d) copper, e) cadmium, f) selenium. Boxplots with different letters are significantly different (ANOVA with Tukey's HSD,  $\alpha = 0.05$ ).

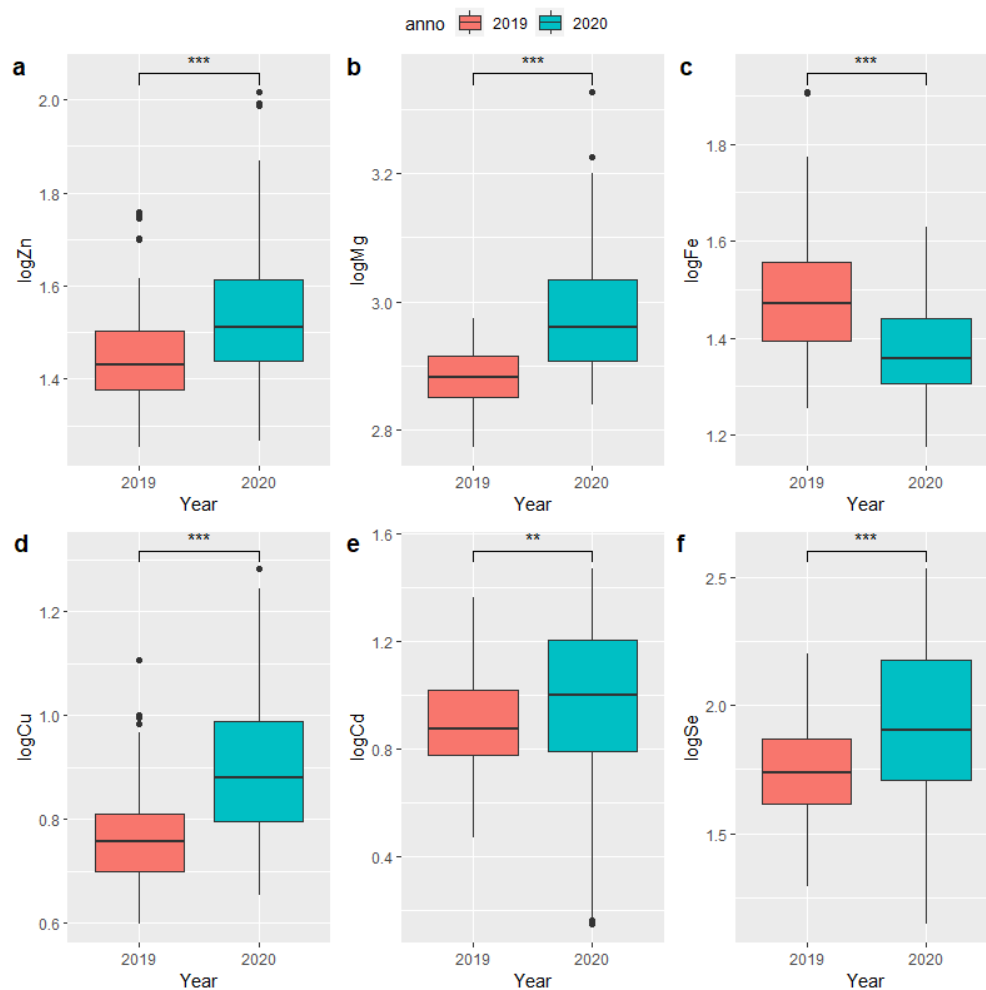

Figure S2 – Microelements content for year. a) zinc, b) magnesium, c) iron, d) copper, e) cadmium, f) selenium. Asterisk indicates significant differences between the years (Student t-test,  $\alpha = 0.05$ ). \*\* = p-value < 0.01; \*\*\* = p-value < 0.001.

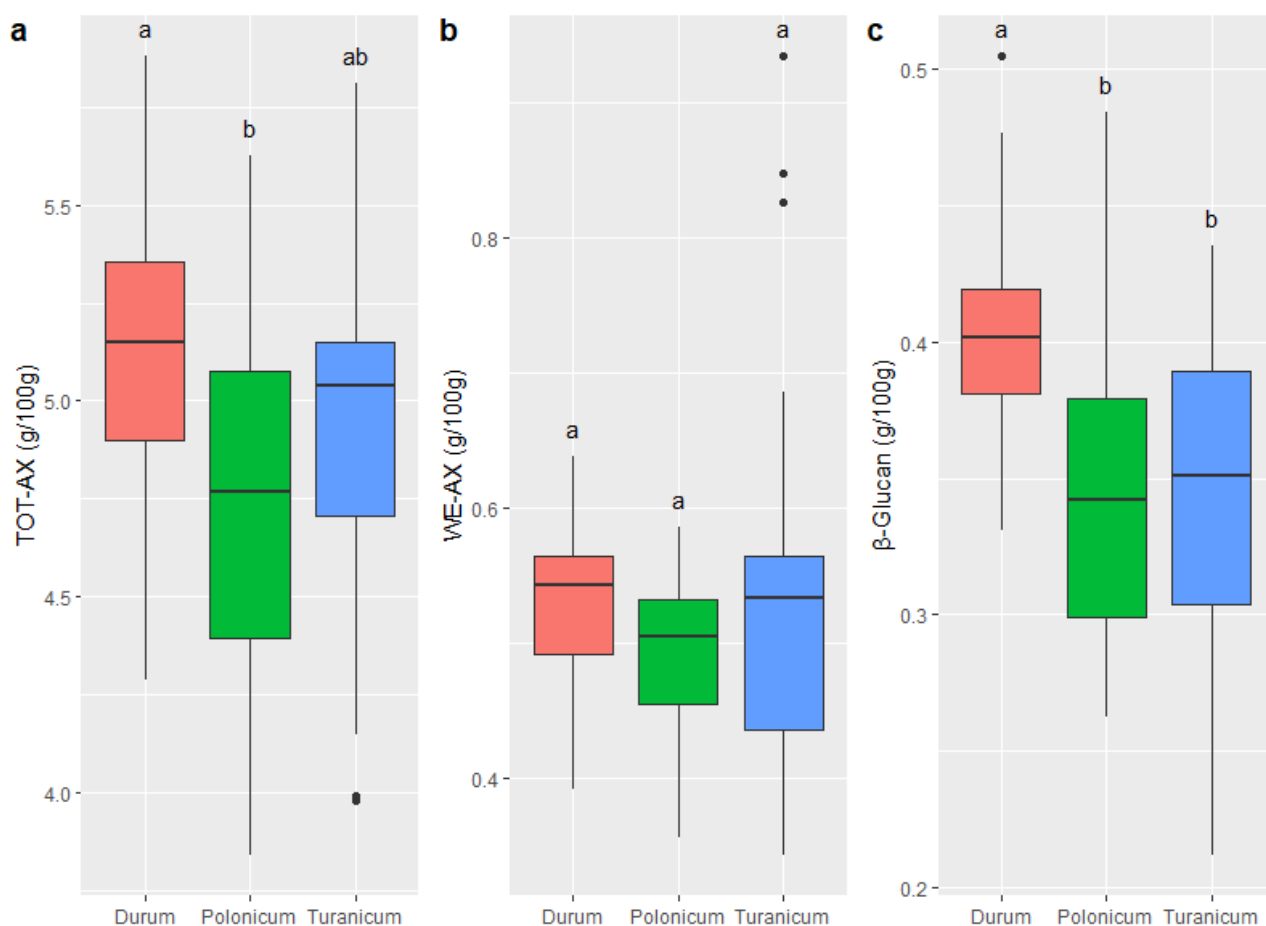

Figure S3 –Fiber content for subspecies a) total arabinoxylan, b) water-extractable arabinoxylan, c)  $\beta$ -glucan. Boxplots with different letters are significantly different (ANOVA with Tukey's HSD,  $\alpha = 0.05$ ).

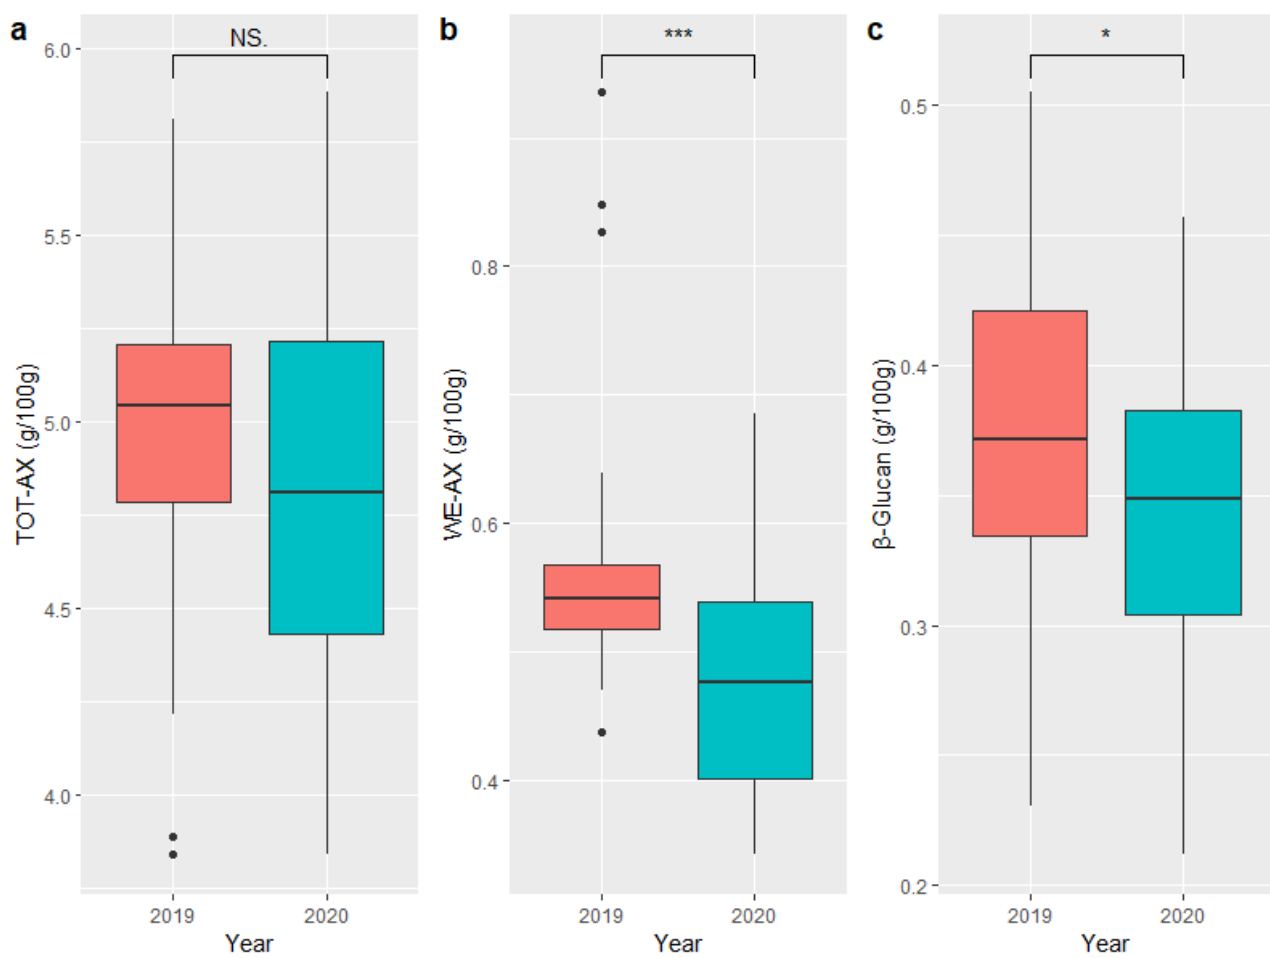

Figure S4 – Fiber content for year. a) total arabinoxylan, b) water-extractable arabinoxylan, c)  $\beta$ -glucan. Asterisk indicates significant differences between the years (Student t-test,  $\alpha = 0.05$ ). \* = p-value < 0.05; \*\*\* = p-value < 0.001; NS. = p-value > 0.05.
