# Supplementary material for: Characterization of Triticum turgidum sspp. durum, turanicum, and polonicum grown in Central Italy in relation to technological and nutritional aspects
Source: Front Plant Sci. 2023 Dec 6;14:1269212. doi: 10.3389/fpls.2023.1269212 (PMC10731273; doi:10.3389/fpls.2023.1269212)
Supplement: Supplementary file 1 [file Table_1.xlsx]

## Sheet: S1
Table S1. Protein content, test weight, gluten %, gluten index and yellow index measured in two growing seasons. d.m.= dry matter.
	Protein (% d.m.)		Test Weight (Kg/hL)		Gluten (% d.m.)		Gluten Index		Yellow Index (b*)
Accession code	2019	2020	2019	2020	2019	2020	2019	2020	2019	2020
Etrusco	14.0 ± 0.28	14.1 ± 0.00	75.6 ± 0.28	82.6 ± 0.28	11.4 ± 0.13	11.3 ± 0.09	13 ± 2.12	24 ± 3.00	25.2 ± 0.15	23.4 ± 0.29
Pol2	14.5 ± 0.21	15.1 ± 0.00	76.5 ± 0.21	80.8 ± 0.00	11.5 ± 0.07	13.3 ± 0.04	54 ± 1.41	58 ± 1.17	20.8 ± 0.32	20.5 ± 0.11
Pol6	14.6 ± 0.07	14.8 ± 0.14	75.5 ± 0.04	81.1 ± 0.14	12.1 ± 0.16	13.2 ± 0.04	36 ± 3.54	33 ± 3.44	22.0 ± 0.02	22.0 ± 0.36
Tur5	13.7 ± 0.14	14.4 ± 0.14	75.6 ± 0.05	82.5 ± 0.28	12.1 ± 0.03	14.4 ± 0.09	3 ± 0.71	31 ± 2.33	22.3 ± 0.15	22.1 ± 0.37
Svevo	14.3 ± 0.35	14.0 ± 0.00	81.3 ± 0.35	84.2 ± 0.21	10.1 ± 0.02	11.4 ± 0.01	74 ± 2.83	91 ± 2.09	26.4 ± 0.16	28.1 ± 0.14
Khor1	13.5 ± 0.14	14.4 ± 0.42	74.2 ± 0.30	82.7 ± 0.42	10.4 ± 0.12	12.3 ± 0.14	16 ± 1.41	30 ± 1.94	26.8 ± 0.18	25.6 ± 0.18

## Sheet: S2
Table S2. Log-transformed mean values ± error standard of each element quantity in every variety divided per years. In every column different letters indicate significant differences (ANOVA with HSD-Tukey, p<0.05).
	LogZn		LogMg		LogFe		LogCu		LogCd		LogSe
Accession code	2019	2020	2019	2020	2019	2020	2019	2020	2019	2020	2019	2020
Tur5	1.446 ± 0.048 a	1.860 ± 0.029 a	2.836 ± 0.009 g	2.959 ± 0.026 bcd	1.443 ± 0.033 ab	1.410 ± 0.024 abc	0.735 ± 0.032 bcde	1.098 ± 0.044 a	0.771 ± 0.030 cd	1.281 ± 0.028 ab	1.356 ± 0.016 g	1.327 ± 0.042 g
Tur21	1.416 ± 0.034 a	1.491 ± 0.017 bcd	2.897 ± 0.009 abcd	3.021 ± 0.026 ab	1.386 ± 0.023 b	1.328 ± 0.012 cde	0.747 ± 0.035 abcde	0.844 ± 0.023 def	1.035 ± 0.049 a	0.800 ± 0.006 ef	1.824 ± 0.016 b	1.957 ± 0.022 d
Tur26	1.493 ± 0.015 a	1.491 ± 0.017 bcd	2.913 ± 0.013 ab	2.974 ± 0.032 abc	1.534 ± 0.032 ab	1.470 ± 0.022 ab	0.763 ± 0.015 abcde	0.874 ± 0.016 def	0.972 ± 0.041 ab	0.670 ± 0.070 f	1.669 ± 0.017 def	1.618 ± 0.024 f
Khor1	1.403 ± 0.029 a	1.410 ± 0.021 d	2.858 ± 0.008 defg	3.032 ± 0.014 ab	1.457 ± 0.019 ab	1.372 ± 0.024 bcde	0.675 ± 0.009 e	0.857 ± 0.023 def	1.045 ± 0.049 a	1.141 ± 0.038 bc	1.593 ± 0.042 f	1.995 ± 0.043 cd
Etrusco	1.423 ± 0.023 a	1.486 ± 0.030 bcd	2.881 ± 0.009 bcdef	2.949 ± 0.009 bcd	1.542 ± 0.033 ab	1.395 ± 0.031 abcd	0.727 ± 0.015 cde	0.856 ± 0.017 def	1.011 ± 0.030 a	0.877 ± 0.024 de	1.742 ± 0.019 bcde	2.077 ± 0.009 c
Pol2	1.501 ± 0.024 a	1.531 ± 0.041 bc	2.901 ± 0.003 abc	2.949 ± 0.015 bcd	1.585 ± 0.029 a	1.360 ± 0.022 cde	0.852 ± 0.016 a	1.060 ± 0.039 ab	0.805 ± 0.021 bcd	0.441 ± 0.039 g	1.792 ± 0.015 bc	2.348 ± 0.010 b
Pol6	1.434 ± 0.016 a	1.801 ± 0.016 a	2.892 ± 0.007 abcde	2.900 ± 0.005 cd	1.509 ± 0.037 ab	1.332 ± 0.026 cde	0.785 ± 0.014 abcd	0.838 ± 0.016 def	0.798 ± 0.014 bcd	1.222 ± 0.027 ab	1.639 ± 0.021 ef	1.788 ± 0.025 e
Pol11	1.435 ± 0.024 a	1.579 ± 0.027 b	2.855 ± 0.004 efg	2.942 ± 0.029 bcd	1.451 ± 0.020 ab	1.362 ± 0.026 bcde	0.688 ± 0.016 de	0.786 ± 0.033 ef	0.767 ± 0.037 cd	1.192 ± 0.036 abc	1.790 ± 0.045 bcd	2.084 ± 0.008 c
Pol304	1.445 ± 0.009 a	1.452 ± 0.016 cd	2.912 ± 0.007 ab	3.018 ± 0.022 ab	1.579 ± 0.043 a	1.338 ± 0.022 cde	0.789 ± 0.008 abcd	0.917 ± 0.034 cde	0.897 ± 0.039 abc	1.030 ± 0.041 cd	2.117 ± 0.022 a	2.367 ± 0.009 b
Pol2156	1.421 ± 0.021 a	1.532 ± 0.024 bc	2.842 ± 0.006 fg	3.067 ± 0.026 a	1.479 ± 0.008 ab	1.399 ± 0.014 abc	0.839 ± 0.045 ab	0.955 ± 0.028 bcd	0.905 ± 0.022 abc	0.791 ± 0.024 ef	2.032 ± 0.014 a	1.775 ± 0.015 e
Aureo	1.515 ± 0.050 a	1.446 ± 0.027 cd	2.923 ± 0.008 a	3.031 ± 0.019 ab	1.485 ± 0.045 ab	1.484 ± 0.033 a	0.772 ± 0.012 abcde	0.930 ± 0.036 bcd	0.897 ± 0.060 abc	1.132 ± 0.023 bc	1.784 ± 0.020 bcd	1.830 ± 0.027 e
Svevo	1.406 ± 0.014 a	1.446 ± 0.021 cd	2.869 ± 0.010 cdefg	3.006 ± 0.026 ab	1.396 ± 0.030 b	1.281 ± 0.019 e	0.728 ± 0.017 cde	1.022 ± 0.027 abc	0.702 ± 0.051 d	0.788 ± 0.049 ef	1.678 ± 0.027 cdef	2.497 ± 0.007 a
Senatore Cappelli	1.451 ± 0.011 a	1.553 ± 0.018 bc	2.919 ± 0.014 ab	2.862 ± 0.006 d	1.593 ± 0.059 a	1.289 ± 0.012 de	0.816 ± 0.027 abc	0.748 ± 0.006 f	0.994 ± 0.011 a	1.348 ± 0.008 a	1.604 ± 0.030 f	1.610 ± 0.025 f

## Sheet: S3
Table S3. Mean values ± error standard of each element quantity in every variety divided per years.
	Zn (ppm)		Mg (ppm)		Fe (ppm)		Cu (ppm)		Cd (ppb)		Se (ppb)
Accession code	2019	2020	2019	2020	2019	2020	2019	2020	2019	2020	2019	2020
Tur5	30.101 ± 3.876	74.207 ± 4.982	686.789 ± 13.779	931.151 ± 65.836	28.714 ± 2.433	26.161 ± 1.395	5.595 ± 0.419	13.206 ± 1.213	6.065 ± 0.424	19.582 ± 1.423	22.883 ± 0.917	22.362 ± 2.200
Tur21	26.968 ± 2.121	31.204 ± 1.220	791.338 ± 15.750	1069.635 ± 67.428	24.653 ± 1.235	21.349 ± 0.564	5.797 ± 0.515	7.099 ± 0.388	11.490 ± 0.996	6.316 ± 0.094	67.232 ± 2.497	91.817 ± 4.627
Tur26	31.287 ± 1.014	31.248 ± 1.276	821.806 ± 24.248	972.942 ± 78.062	35.341 ± 2.878	29.931 ± 1.408	5.823 ± 0.188	7.536 ± 0.279	9.886 ± 1.018	5.207 ± 0.543	47.038 ± 1.865	42.142 ± 2.138
Khor1	25.946 ± 1.820	26.002 ± 1.187	722.695 ± 13.802	1082.592 ± 33.836	28.959 ± 1.381	23.934 ± 1.332	4.740 ± 0.099	7.311 ± 0.392	11.990 ± 1.592	14.458 ± 1.366	41.199 ± 3.910	104.605 ± 11.132
Etrusco	26.891 ± 1.424	31.458 ± 2.233	761.692 ± 15.003	892.226 ± 18.905	36.009 ± 2.923	25.551 ± 1.960	5.376 ± 0.192	7.237 ± 0.281	10.536 ± 0.737	7.654 ± 0.360	55.820 ± 2.349	119.741 ± 2.590
Pol2	32.237 ± 1.795	35.592 ± 3.274	796.955 ± 6.246	895.136 ± 31.919	39.434 ± 2.813	23.229 ± 1.118	7.156 ± 0.259	11.976 ± 1.027	6.474 ± 0.341	2.872 ± 0.229	62.389 ± 2.189	223.688 ± 5.141
Pol6	27.334 ± 0.962	63.780 ± 2.279	781.369 ± 12.819	794.790 ± 9.806	33.703 ± 3.203	21.930 ± 1.326	6.127 ± 0.195	6.939 ± 0.256	6.313 ± 0.206	17.010 ± 1.035	44.070 ± 2.116	62.459 ± 3.555
Pol11	27.720 ± 1.736	38.695 ± 2.111	717.099 ± 6.721	899.142 ± 71.084	28.590 ± 1.340	23.469 ± 1.371	4.910 ± 0.187	6.312 ± 0.515	6.092 ± 0.527	16.130 ± 1.313	65.075 ± 5.821	121.611 ± 2.169
Pol304	27.930 ± 0.586	28.490 ± 1.036	817.233 ± 13.014	1056.444 ± 54.744	39.948 ± 3.725	22.073 ± 1.149	6.161 ± 0.115	8.547 ± 0.706	8.265 ± 0.797	11.228 ± 0.960	132.800 ± 6.301	233.113 ± 4.595
Pol2156	26.752 ± 1.438	34.604 ± 1.919	695.435 ± 9.128	1192.942 ± 89.013	30.165 ± 0.560	25.221 ± 0.847	7.369 ± 0.864	9.241 ± 0.620	8.142 ± 0.392	6.278 ± 0.304	108.357 ± 3.424	60.005 ± 2.015
Aureo	35.283 ± 4.104	28.535 ± 1.780	839.846 ± 15.412	1087.102 ± 49.822	32.531 ± 3.622	31.435 ± 2.262	5.938 ± 0.170	8.849 ± 0.753	8.806 ± 1.316	13.734 ± 0.664	61.591 ± 2.940	68.993 ± 4.126
Svevo	25.614 ± 0.896	28.316 ± 1.402	742.668 ± 18.078	1036.499 ± 69.666	25.573 ± 1.927	19.274 ± 0.794	5.386 ± 0.207	10.764 ± 0.715	5.448 ± 0.661	6.533 ± 0.628	48.585 ± 2.851	314.536 ± 5.305
Senatore Cappelli	28.346 ± 0.720	36.071 ± 1.496	833.883 ± 25.717	728.502 ± 10.672	43.434 ± 6.159	19.543 ± 0.536	6.700 ± 0.461	5.599 ± 0.072	9.900 ± 0.244	22.345 ± 0.396	41.259 ± 2.716	41.511 ± 2.419

## Sheet: S4
Table S4. Mean values ± error standard of fiber content in every variety divided per years. In every column different letters indicate significant differences (ANOVA with HSD-Tukey, p<0.05).
	TOT-AX (g/100g)		WE-AX (g/100g)		β-Glucan (g/100g)
Accession code	2019	2020	2019	2020	2019	2020
Tur5	5.077 ± 0.020 ab	4.993 ± 0.074 abc	0.535 ± 0.013 bcd	0.359 ± 0.009 g	0.385 ± 0.019 bcd	0.356 ± 0.014 bcd
Tur21	4.782 ± 0.051 abc	5.094 ± 0.318 ab	0.549 ± 0.017 bcd	0.558 ± 0.000 b	0.389 ± 0.009 bc	0.348 ± 0.014 bcd
Tur26	5.210 ± 0.308 a	4.397 ± 0.178 abc	0.870 ± 0.033 a	0.664 ± 0.016 a	0.428 ± 0.004 ab	0.334 ± 0.017 bcde
Khor1	5.465 ± 0.064 a	4.128 ± 0.144 bc	0.544 ± 0.011 bcd	0.409 ± 0.010 fg	0.367 ± 0.025 bcd	0.306 ± 0.002 de
Etrusco	5.127 ± 0.022 a	4.997 ± 0.188 abc	0.510 ± 0.024 cd	0.431 ± 0.009 def	0.260 ± 0.017 e	0.223 ± 0.006 f
Pol2	5.406 ± 0.150 a	4.864 ± 0.274 abc	0.510 ± 0.019 cd	0.420 ± 0.008 efg	0.334 ± 0.023 cde	0.349 ± 0.004 bcd
Pol6	4.863 ± 0.202 abc	4.894 ± 0.169 abc	0.516 ± 0.005 cd	0.540 ± 0.014 bc	0.310 ± 0.012 de	0.313 ± 0.016 cde
Pol11	4.309 ± 0.218 bc	5.178 ± 0.229 ab	0.467 ± 0.016 d	0.368 ± 0.011 fg	0.366 ± 0.020 bcd	0.344 ± 0.023 bcd
Pol304	4.804 ± 0.118 abc	4.656 ± 0.167 abc	0.542 ± 0.015 bcd	0.498 ± 0.019 bcd	0.468 ± 0.009 a	0.447 ± 0.005 a
Pol2156	4.146 ± 0.161 c	3.980 ± 0.100 c	0.565 ± 0.011 bc	0.478 ± 0.015 cde	0.323 ± 0.013 cde	0.271 ± 0.006 ef
Aureo	5.067 ± 0.109 ab	4.697 ± 0.248 abc	0.530 ± 0.013 cd	0.503 ± 0.021 bc	0.427 ± 0.010 ab	0.381 ± 0.025 abc
Svevo	5.045 ± 0.168 ab	5.429 ± 0.233 a	0.619 ± 0.010 b	0.545 ± 0.019 bc	0.481 ± 0.012 a	0.390 ± 0.006 ab
Senatore Cappelli	5.287 ± 0.067 a	5.391 ± 0.261 a	0.554 ± 0.008 bc	0.395 ± 0.002 fg	0.357 ± 0.007 bcd	0.391 ± 0.007 ab
